# Supplementary material
Source: Research Square preprint supplement (doi:10.21203/rs.3.rs-10155604/v1)
Supplement: Supplementary file 1 [file bc1ef99aca01e6b448908de4.docx]

**Supplementary Figure_S1**.


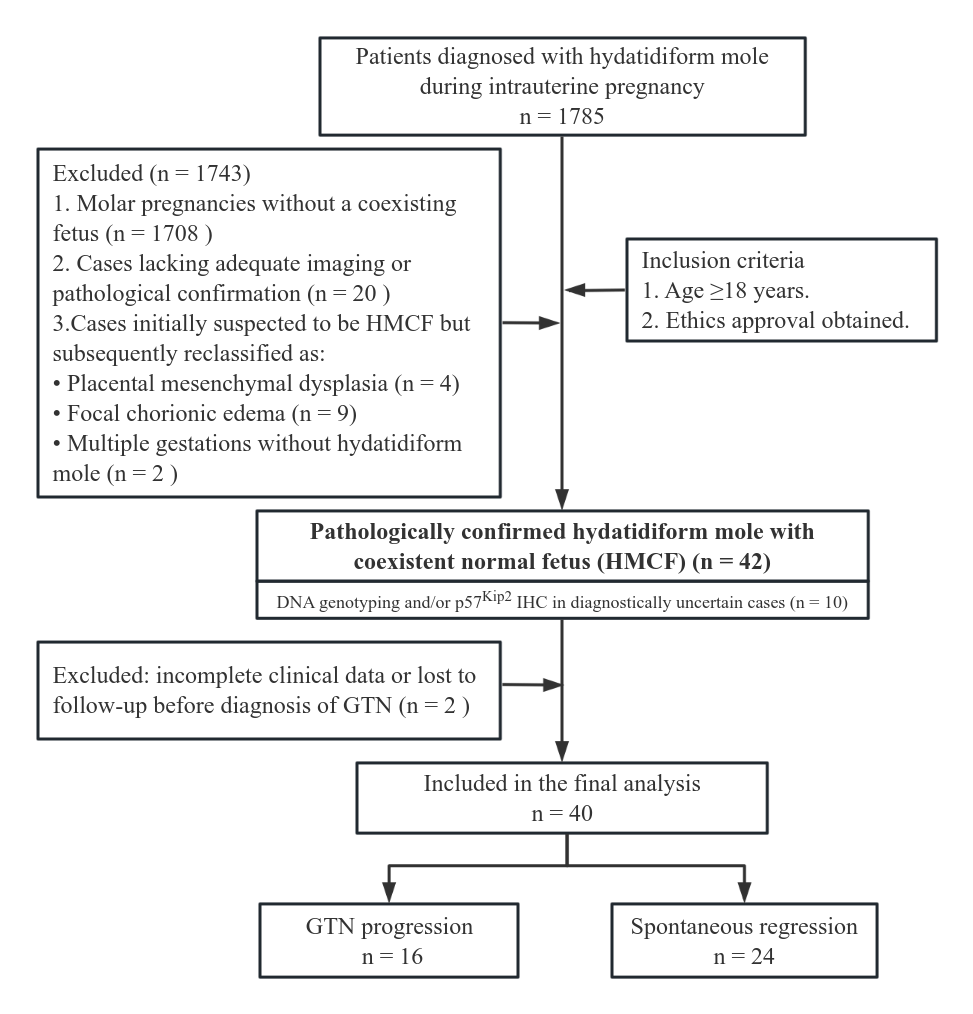


**Figure_S1.** Case Selection Flowchart for HMCF Analysis.

| **Supplementary Table S1.** Clinical characteristics of patients who developed gestational trophoblastic neoplasia (GTN) after hydatidiform mole with a coexistent normal fetus (HMCF). | |
| --- | --- |
| GTN type |  |
| Invasive mole | 15(93.8%) |
| Choriocarcinoma | 1(6.3%) |
| FIGO stage |  |
| I | 6(37.5%) |
| III | 10(62.5%) |
| FIGO score |  |
| 0-6 (low risk) | 16(100%) |
| > 6 (high risk) | 0(0.0%) |
| First line treatment | 14 |
| Methotrexate | 12(85.7%) |
| Actinomycin D | 1(7.1%) |
| Multiagent chemotherapy | 1(7.1%) |
| Primary response to first line methotrexate | 7(50.0%) |
| Overall cure rate | 14(100%) |
